# Supplementary material for: Controllable dielectric performance of polymer composites via the Coulomb-blockade effect with core–shell structured nano-particles
Source: Royal Society of Chemistry journal article supplement (doi:10.1039/c7tc00978j), 2017-01-01
Supplement: c7tc00978j1.pdf [file c7tc00978j1.pdf]

## Supplementary Information

### **Controllable dielectric performance of polymer composites via Coulomb-blockade effect with core-shell structured nano-particles**

Dan Yang,<sup>ab</sup> Shuo Huang,<sup>bc</sup> Mengnan Ruan,<sup>bc</sup> Yibo Wu,<sup>ab</sup> Shuxin Li,<sup>ab</sup> Hao Wang,<sup>ab</sup>

Jinyu Zhang,<sup>a</sup> Haonan Ma,<sup>a</sup> Wenli Guo,<sup>\*ab</sup> and Liqun Zhang<sup>\*c</sup>

<sup>a</sup>Department of Materials Science and Engineering, Beijing Institute of Petrochemical  
Technology, Beijing 102617, China

<sup>b</sup>Beijing Key Lab of Special Elastomeric Composite Materials, Beijing 102617, China

<sup>c</sup>Department of Materials Science and Engineering, Beijing University of Chemical  
Technology, Beijing 100029, China

\*To whom correspondence should be addressed.

E-mail: W. Guo ([gwenli@bipt.edu.cn](mailto:gwenli@bipt.edu.cn)) or L. Zhang ([zhanglq@mail.buct.edu.cn](mailto:zhanglq@mail.buct.edu.cn))

Table S1 Summary of dielectric properties and electrical properties of pure NBR and NBR composites.

| Sample                         | Dielectric constant (100 Hz) | Dielectric loss (100 Hz) | Conductivity $S\ m^{-1}$ (100 Hz) | DC volume resistivity ( $\Omega\ cm$ ) | Electrical breakdown strength (kV/mm) | Energy density ( $kJ/m^3$ ) | Dielectric relaxation time (s) |
|--------------------------------|------------------------------|--------------------------|-----------------------------------|----------------------------------------|---------------------------------------|-----------------------------|--------------------------------|
| Pure NBR                       | 12.28                        | 0.026                    | 2.12E-11                          | 1.29E+10                               | 45±5.0                                | 110.08                      | 1.50E-57                       |
| TiO <sub>2</sub> /NBR          | 12.84                        | 0.039                    | 3.11E-11                          | 3.02E+09                               | 41±4.4                                | 105.03                      | 1.60E-78                       |
| TiO <sub>2</sub> -PDA/NBR      | 12.96                        | 0.033                    | 2.83E-11                          | 3.29E+09                               | 43±2.8                                | 96.40                       | 1.30E-59                       |
| TiO <sub>2</sub> -PDA-Ag30/NBR | 12.55                        | 0.129                    | 1.22E-10                          | 1.91E+09                               | 30±3.2                                | 49.97                       | 8.10E-81                       |
| TiO <sub>2</sub> -PDA-Ag60/NBR | 12.10                        | 0.075                    | 6.41E-11                          | 1.23E+09                               | 35±2.4                                | 65.61                       | 3.30E-85                       |
| TiO <sub>2</sub> -PDA-Ag90/NBR | 11.72                        | 0.057                    | 5.37E-11                          | 8.69E+08                               | 39±3.8                                | 78.86                       | 2.50E-133                      |

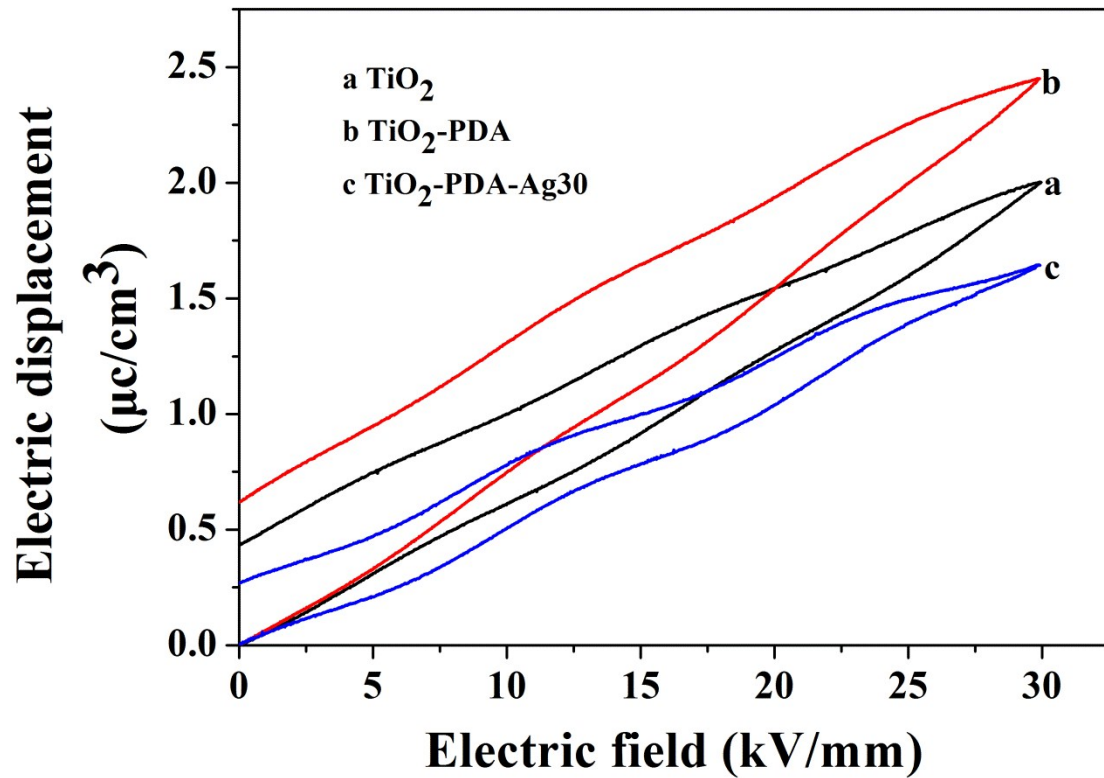

Figure S1 Displacement-electric field (D-E) loops of NBR composites at a field of 30 kV/mm.

Figure S1 shows the displacement-electric field (D-E) loops of NBR composites filled with TiO<sub>2</sub>, TiO<sub>2</sub>-PDA, and TiO<sub>2</sub>-PDA-Ag particles at a field of 30 kV/mm. From Figure S1, we can find the maximal electric displacement is obtained by TiO<sub>2</sub>-PDA/NBR composite, while the TiO<sub>2</sub>-PDA-Ag/NBR composite displayed the minimum electric displacement. This phenomenon maybe attributed to the difference of dielectric constant of the samples.<sup>1</sup> In addition, the TiO<sub>2</sub>-PDA-Ag/NBR composite exhibits the narrowest D-E loops and the lowest remnant polarization in comparison with the TiO<sub>2</sub> /NBR composite and TiO<sub>2</sub>-PDA/NBR composite.

## Reference

1. K. Yang, X. Huang, J. He and P. Jiang, *Adv Mater Inter*, 2015, 2, 1500361.
